# Supplementary material for: Upregulation of miR-133b and miR-328 in Patients With Atrial Dilatation: Implications for Stretch-Induced Atrial Fibrillation
Source: Front Physiol. 2019 Sep 10;10:1133. doi: 10.3389/fphys.2019.01133 (PMC6748158; doi:10.3389/fphys.2019.01133)
Supplement: Supplementary file 1 [file Presentation_1.zip › Supplementary Material/Data_Sheet_1.xlsx]

## Sheet: miRNA normalized expression
Supplementary Data Sheet. Normalized expression of the panel of microRNAs in the study population.
Patient	miR-1-3p	miR-133a-3p	miR-133b	miR-21-5p	miR-29a-3p	miR-29b-3p	miR-208a-3p	miR-208b-3p	miR-30c-5p	miR-328-3p	miR-499a-5p	miR-590-5p
1	0.6965	0.6376	0.8288	0.6202	0.3174	0.4171	0.2672	0.3215	0.6547	0.6684	0.3383	1.1264
2	1.0561	0.6138	1.0113	1.3533	1.0196	1.0927	0.5492	0.8033	1.4615	1.7056	0.6032	1.9258
3	0.2394	0.2898	0.244	0.4805	0.6499	0.2693	0.0845	0.1561	0.315	0.2592	0.2728	0.346
4	1.3273	3.2452	3.7387	9.4126	1.0999	0.7534	0.1217	1.457	2.0741	3.3999	0.5961	3.879
5	0.6685	0.926	1.7592	1.1389	0.7994	0.3646	0.2348	0.3238	1.4716	1.5586	0.4962	0.5688
6	1.0263	3.7449	1.3959	12.3023	1.8813	1.5514	2.865	3.6595	1.6361	1.3211	3.1153	2.6328
7	2.9142	10.2218	1.1311	2.5718	3.5798	4.1961	4.8976	2.5482	2.0455	1.6533	3.2464	1.4148
8	3.8591	2.1846	4.2061	3.2661	3.8591	3.8173	5.9288	5.6448	3.5297	3.5054	2.5592	3.82
9	0.5314	0.9856	1.0868	0.8727	0.8701	1.264	1.3533	0.559	1.3211	1.5619	7.5572	1.3978
10	0.7785	1.3207	0.7987	6.4838	0.8465	0.7067	0.5255	1.8466	1.0263	1.6924	0.9405	0.8598
11	1.7972	1.4956	3.4472	0.6915	1.3499	1.0474	2.3752	0.9758	1.5502	1.8587	2.5245	1.5292
12	1.0709	1.3856	1.2827	0.6656	1.2844	1.6061	2.1116	0.9113	1.0318	1.2434	1.1294	0.48
13	0.7345	0.6079	1.7772	0.6913	1.4622	1.3256	2.4132	1.3423	1.2093	1.1635	1.3171	1.3353
14	0.6301	1.1152	2.0031	1.3425	0.6312	0.8712	1.6284	0.8589	1.127	1.5725	0.9113	1.2152
15	0.9523	1.3023	1.2716	2.2821	0.9937	1.3183	3.8246	3.4288	1.1066	1.1614	3.5177	1.4085
16	1.0155	1.449	2.0853	1.9969	1.1878	1.665	2.0369	0.7169	1.5513	1.9793	1.7455	1.7149
17	2.6018	0.7862	1.4911	0.9181	0.7116	0.6918	0.8449	2.3204	1.1747	1.2183	1.0575	1.0429
18	1.241	0.4028	1.2158	1.5758	0.9825	0.9951	2.81	1.9628	0.8445	0.9245	1.8312	0.5623
19	15.5715	19.6075	0.2106	3.0244	23.89	8.6788	0.1463	4.2636	1.544	1.7593	0.6307	4.8976
20	13.1546	2.555	1.7361	2.7895	10.9663	3.9381	4.3119	2.7171	1.2086	0.791	2.4425	4.3936
21	18.1366	0.6775	0.287	8.594	2.7321	1.1	43.3612	25.612	5.3332	2.7606	3.685	15.8391
22	1.1205	4.5525	0.0236	2.7258	11.353	2.5506	0.3606	4.2686	0.3987	0.2127	0.2561	8.8689
23	0.1579	0.4099	1.6462	0.6043	0.0626	1.6068	0.9086	0.2577	0.2192	0.662	0.3341	0.2001
24	7.5728	0.3463	1.65	20.6776	11.5381	8.5199	0.3982	17.1335	7.4988	2.8382	5.1994	27.8979
25	3.9199	22.5231	3.6786	8.9177	8.9074	5.7524	4.7294	0.22	4.1315	4.9991	2.2013	17.4129
26	4.9274	1.8704	2.2855	25.8125	4.6321	7.5379	4.976	0.7164	1.8383	1.9119	4.6751	6.5906
27	11.1902	4.1315	2.4214	19.6983	45.2026	1.6711	1.9747	2.9155	4.2379	2.6147	9.437	36.3887
28	0.8791	0.5105	0.5861	0.1586	1.1961	0.3554	0.11	3.0079	4.1077	0.9191	0.6651	0.3524
29	1.4616	2.555	0.4535	0.4043	2.8845	0.2323	2.0116	1.8009	0.6043	0.8596	0.9626	2.1516
30	11.5581	1.3287	3.2173	1.2702	4.2624	2.5213	6.9243	3.0711	0.6127	1.7797	0.2664	2.2121
